# Supplementary material
Source: MDPI journal article supplement (https://www.mdpi.com/2072-4292/11/7/744)
Supplement: s1 [file s1]

# Supplementary Materials: An Attempt to Observe Vertical Land Motion along the Norwegian Coast by CryoSat-2 and Tide Gauges

Martina Idžanović <sup>1,\*</sup> , Christian Gerlach <sup>1,2</sup>, Kristian Breili <sup>1,3</sup>, and Ole Baltazar Andersen <sup>4</sup>

## 1 Contents

### 2 1. Table S1

## 3 Introduction

4 This supporting information include a table listing the tide-gauge locations used in this study, and  
 5 linear vertical land motion (VLM) rates as well as associated uncertainties at 20 tide gauges, estimated  
 6 using CryoSat-2 observations (1 Hz and 20 Hz) and tide-gauge data provided by PSMSL and NMA  
 7 covering same time spans as CryoSat-2, i.e., from 2010 to 2018.

**Table S1.** Location of 20 tide gauges along the Norwegian coast as well as estimated linear VLM rates and corresponding uncertainties at tide gauges in mm/yr.

| Tide Gauge   | $\varphi$ (°) | $\lambda$ (°) | VLM <sub>1HzPSMSL</sub> | VLM <sub>1HzNMA</sub> | VLM <sub>20HzPSMSL</sub> | VLM <sub>20HzNMA</sub> |
|--------------|---------------|---------------|-------------------------|-----------------------|--------------------------|------------------------|
| Vardø        | 70.375        | 31.104        | $6.9 \pm 6.9$           | $7.0 \pm 3.5$         | $3.9 \pm 3.3$            | $4.1 \pm 1.4$          |
| Honningsvåg  | 70.980        | 25.973        | $-7.0 \pm 7.9$          | $-2.2 \pm 5.2$        | $-4.6 \pm 3.9$           | $2.7 \pm 2.1$          |
| Hammerfest   | 70.665        | 23.683        | $-4.4 \pm 13.7$         | $-1.8 \pm 10.1$       | $-2.1 \pm 8.0$           | $-3.9 \pm 4.9$         |
| Andenes      | 69.326        | 16.135        | $6.7 \pm 8.6$           | $-0.7 \pm 3.8$        | $14.8 \pm 2.9$           | $0.4 \pm 1.5$          |
| Harstad      | 68.801        | 16.548        | $2.1 \pm 12.1$          | $-3.3 \pm 8.3$        | $1.7 \pm 6.2$            | $7.1 \pm 4.5$          |
| Kabelvåg     | 68.213        | 14.482        | $-6.7 \pm 12.7$         | $2.2 \pm 6.9$         | $-11.9 \pm 6.4$          | $1.3 \pm 2.5$          |
| Bodø         | 67.288        | 14.391        | $-10.7 \pm 12.6$        | $3.3 \pm 4.0$         | $-4.1 \pm 7.9$           | $6.1 \pm 4.1$          |
| Rørvik       | 64.860        | 11.230        | $6.5 \pm 8.8$           | $3.4 \pm 3.3$         | $7.9 \pm 4.2$            | $4.2 \pm 1.7$          |
| Mausund      | 63.869        | 8.666         | $8.9 \pm 10.1$          | $2.1 \pm 5.4$         | $10.8 \pm 5.5$           | $2.2 \pm 1.8$          |
| Trondheim    | 63.436        | 10.392        | $27.8 \pm 27.1$         | $18.6 \pm 15.0$       | $27.9 \pm 18.1$          | $5.4 \pm 7.2$          |
| Heimsjø      | 63.425        | 9.102         | $12.8 \pm 13.4$         | $4.8 \pm 10.8$        | $24.0 \pm 12.1$          | $7.9 \pm 6.6$          |
| Kristiansund | 63.114        | 7.734         | $-7.2 \pm 7.6$          | $-5.8 \pm 4.6$        | $1.4 \pm 3.5$            | $-1.5 \pm 2.2$         |
| Ålesund      | 62.469        | 6.152         | $-3.8 \pm 11.9$         | $0.2 \pm 7.6$         | $0.6 \pm 3.7$            | $3.7 \pm 1.6$          |
| Måløy        | 61.934        | 5.113         | $1.1 \pm 6.6$           | $-5.3 \pm 3.1$        | $-0.9 \pm 2.7$           | $-4.9 \pm 1.1$         |
| Bergen       | 60.398        | 5.321         | $3.6 \pm 8.5$           | $3.9 \pm 5.4$         | $3.4 \pm 4.4$            | $0.6 \pm 3.4$          |
| Stavanger    | 58.974        | 5.730         | $-14.7 \pm 5.4$         | $0.8 \pm 4.5$         | $-9.5 \pm 1.9$           | $7.1 \pm 1.5$          |
| Tregde       | 58.006        | 7.555         | $7.5 \pm 7.3$           | $5.1 \pm 3.7$         | $8.1 \pm 2.3$            | $4.1 \pm 1.3$          |
| Helgeroa     | 58.995        | 9.856         | $15.9 \pm 9.8$          | $6.0 \pm 4.9$         | $16.5 \pm 3.8$           | $5.7 \pm 2.0$          |
| Oscarsborg   | 59.995        | 10.605        | $26.1 \pm 13.2$         | $6.2 \pm 7.8$         | $16.8 \pm 18.5$          | $15.1 \pm 11.3$        |
| Viker        | 59.036        | 10.950        | $16.2 \pm 11.7$         | $3.6 \pm 5.7$         | $5.9 \pm 4.1$            | $-0.2 \pm 1.7$         |
